# Supplementary material for: Mechanism of lipid droplet formation by the yeast Sei1/Ldb16 Seipin complex
Source: PubMed Central journal article supplement (PMC8501077; doi:10.1038/s41467-021-26162-6), 2021-10-08
Supplement: 41467_2021_26162_MOESM1_ESM.pdf [file 41467_2021_26162_MOESM1_ESM.pdf]

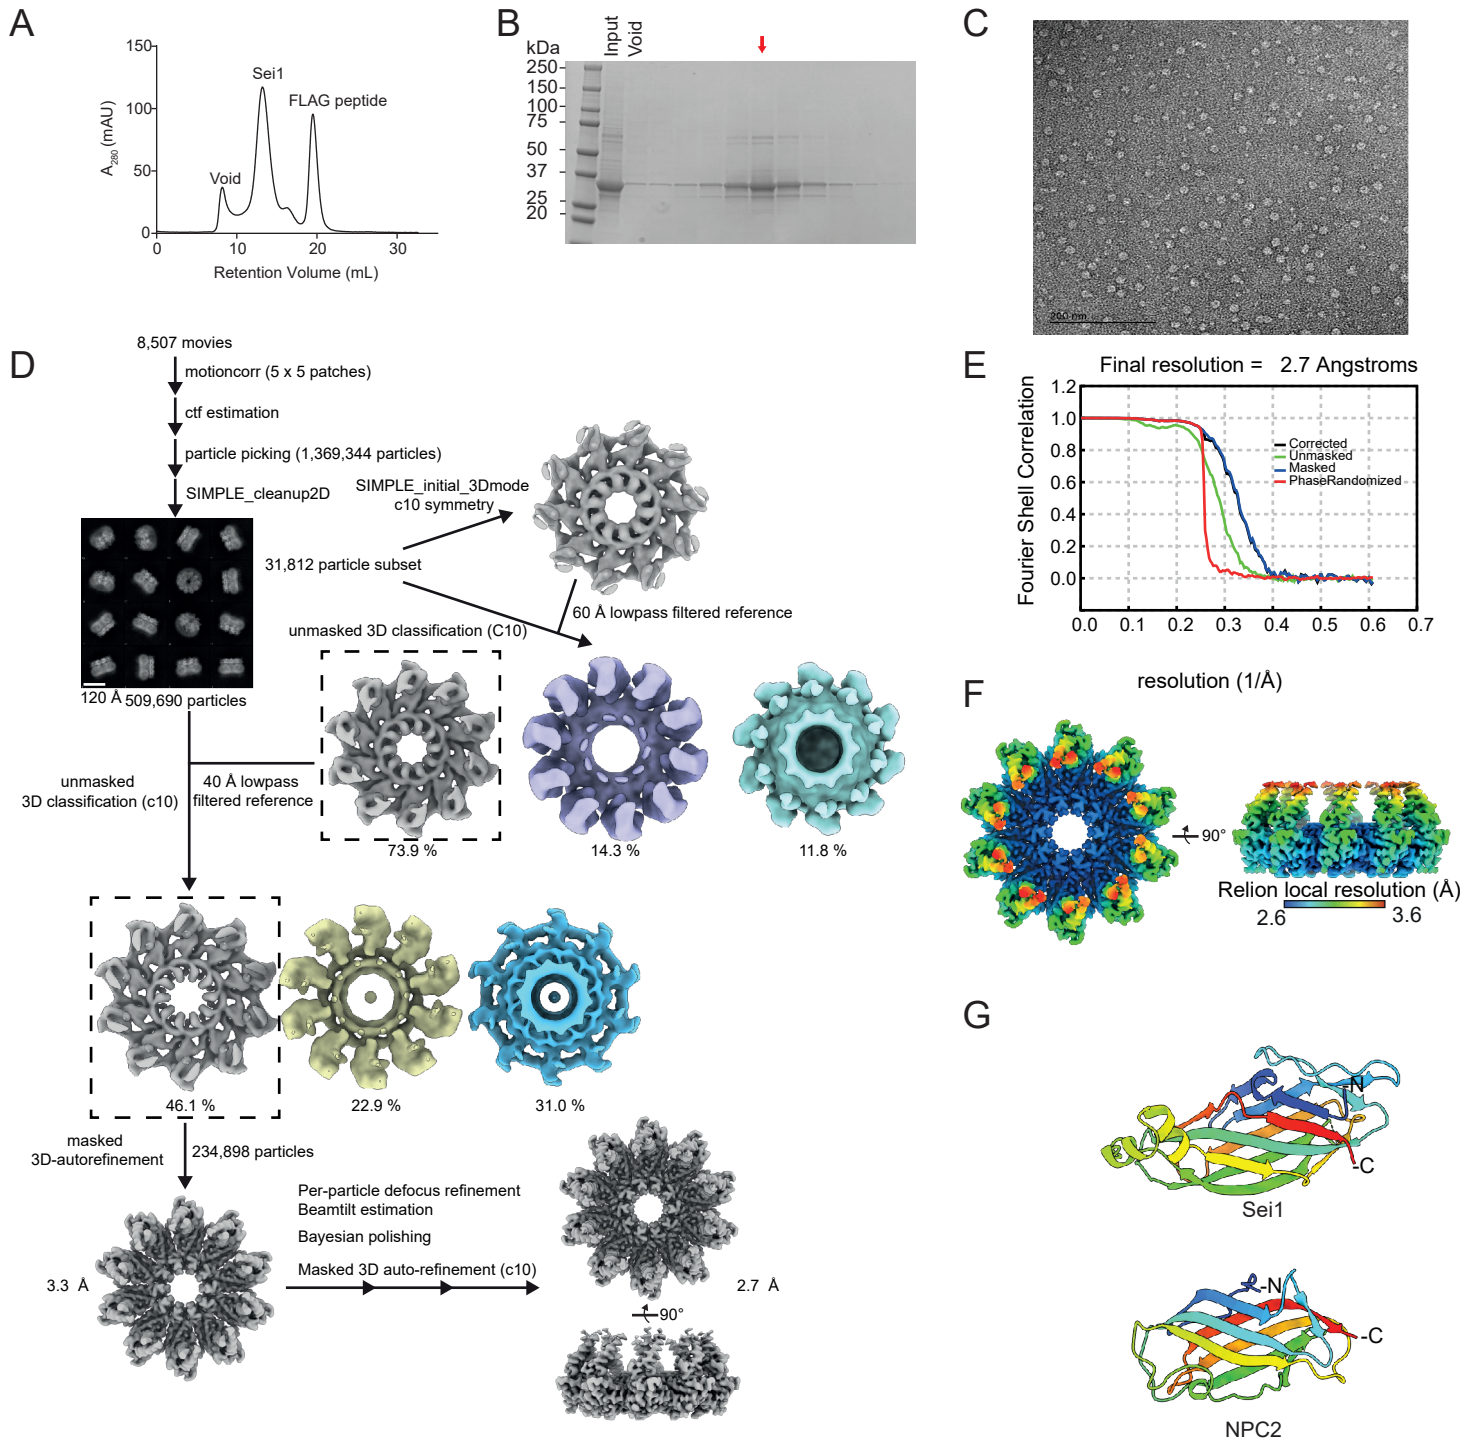

## Figure S1 - Structure determination of Sei1

(a) Size exclusion chromatogram of the Sei1-3xFLAG purification run used for cryo-EM structure determination.  $A_{280}$  is the absorbance at 280 nm in arbitrary units.

(b) Instant Blue-stained SDS PAGE gel of purified Sei1-3xFLAG. Input pertains to the material injected onto the size exclusion column. Each lane is taken from a consecutive 1mL fraction following the void fraction. Red arrow denotes sample taken for cryo-EM structure determination. At least 3 repeats of the purification were carried out with similar results.

(c) Representative negative stain of purified Sei1-3xFLAG used for structural analysis. Negative stain was carried out twice with similar results.

(d) Cryo-EM data processing workflow for Sei1.

(e) Gold-standard FSC curves used for global-resolution estimates of Sei1 map, as determined within RELION-3.1. Red, phase-randomized; green, unmasked; blue, masked; black, corrected.

(f) Local-resolution estimation of reconstructed Sei1 map as determined within RELION-3.1. Volume contoured at threshold level of 0.007, with detergent density omitted for clarity.

(g) Side by side depictions of the Sei1 luminal domain and NPC2 (PDB 2HKA).

**A**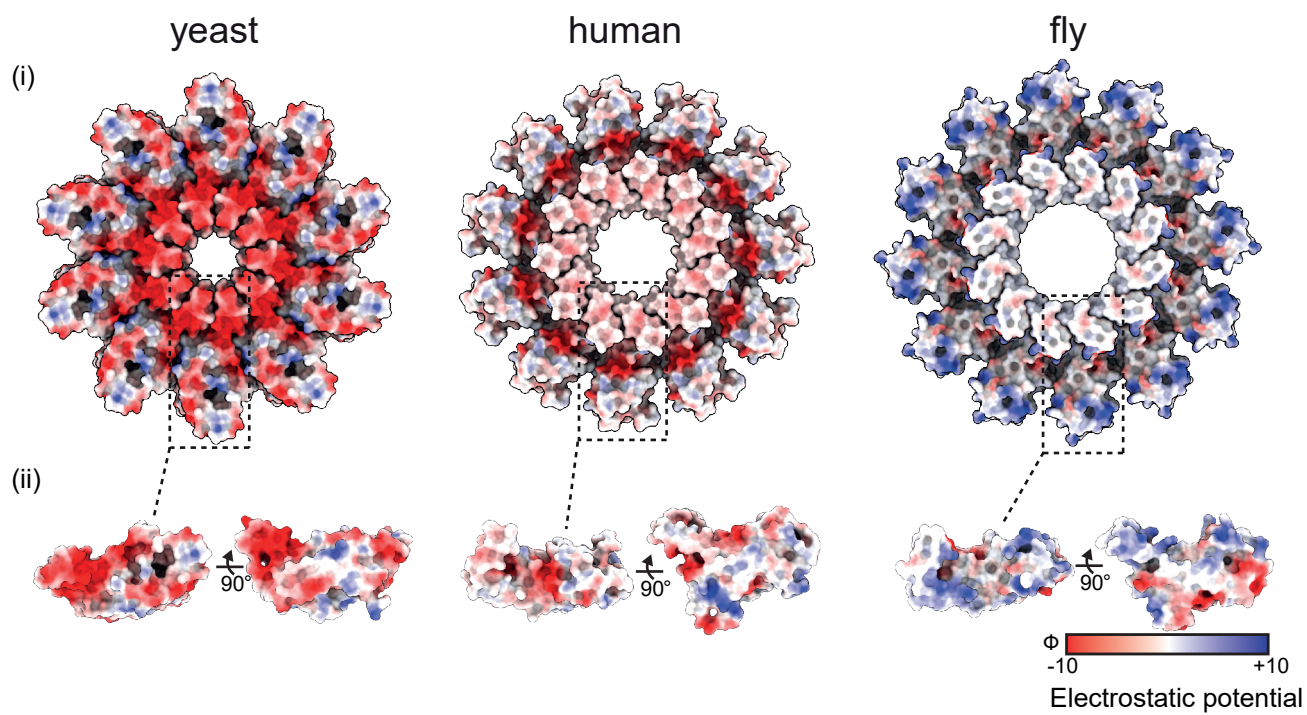**B**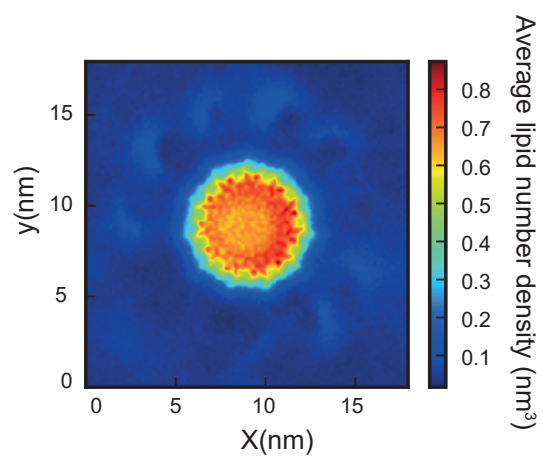

## **Figure S2 – comparison of Seipin luminal domains**

(a) Coulombic electrostatic potential surface representation (Red, negative charge; blue, positive charge; white, no charge) of Seipin luminal domains from yeast (left), human (middle) and fly (right), as determined in ChimeraX. (i) View of homodecameric assembly from cytosol or (ii) as individual protomers.

(b) Top View of coarse-grained molecular dynamic simulations of Human Seipin (PDB 6DS5) in a POPC membrane with 3% trioleoylglycerol. Images depict average lipid number density of trioleoylglycerol.

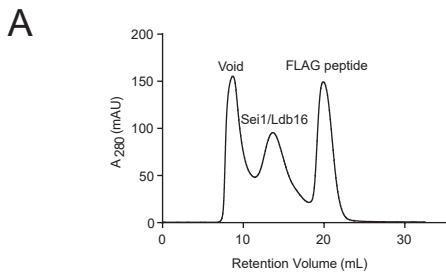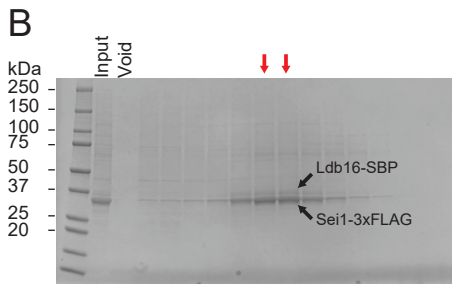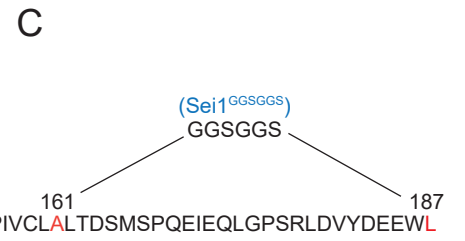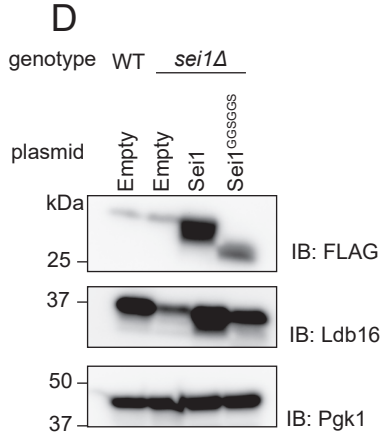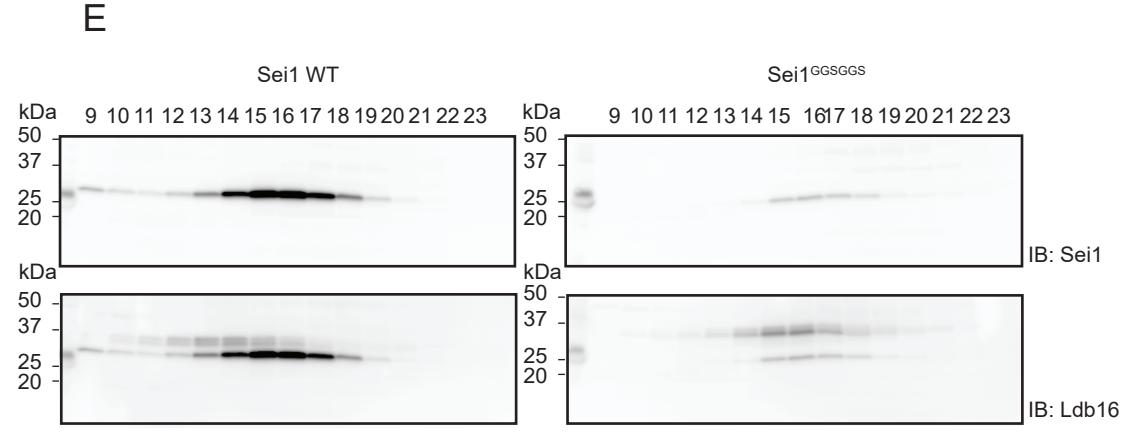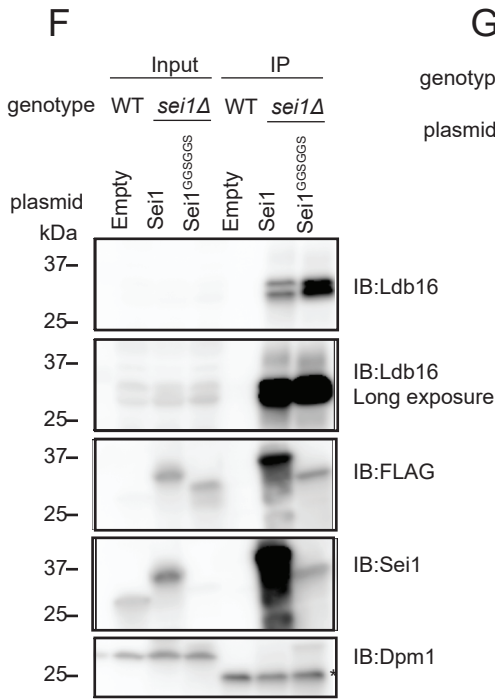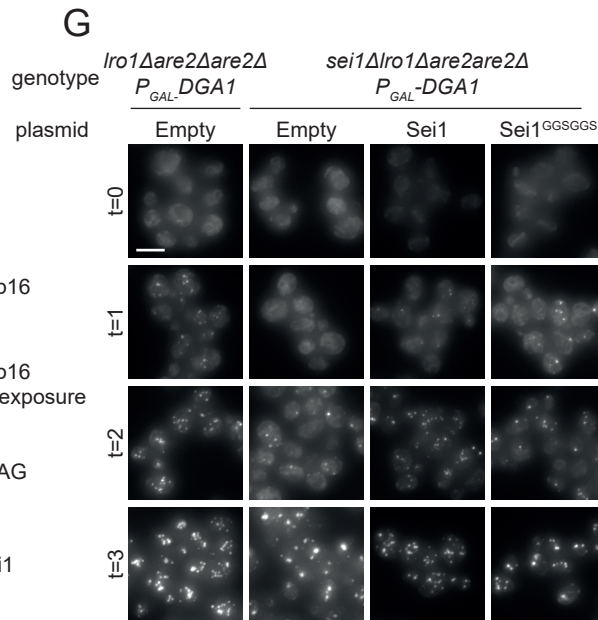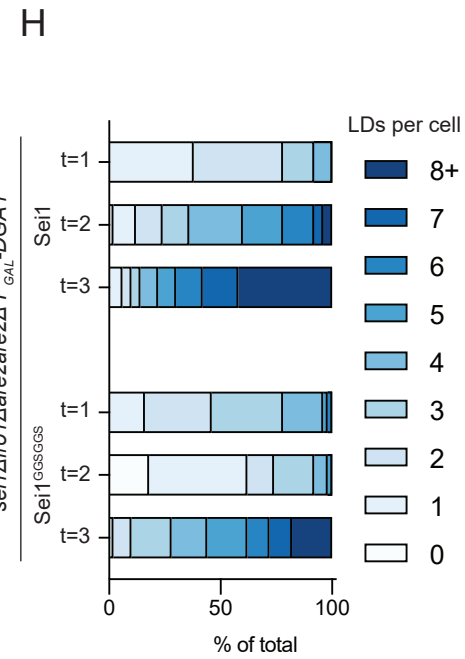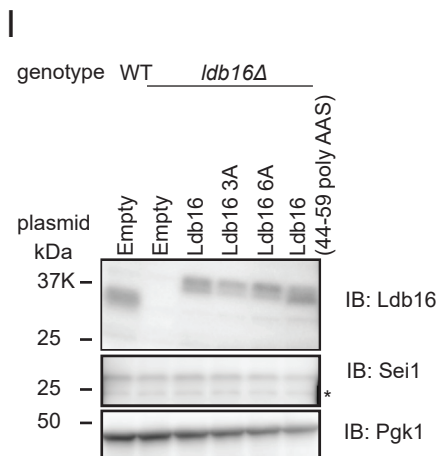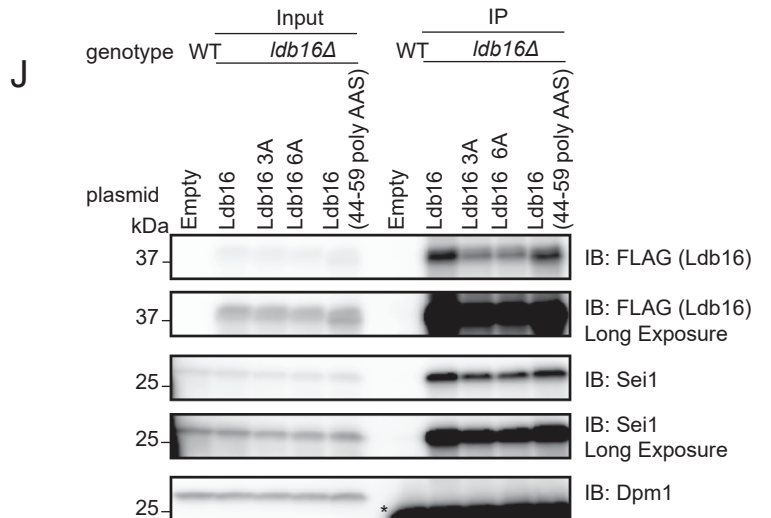

### Figure S3 – Ldb16 complements Sei1 structure for LD formation

(a) Size exclusion chromatogram of the Sei1-3xFLAG and Ldb16-SBP purification run used for cryo-EM structure determination.  $A_{280}$  is the absorption at 280 nm in arbitrary units

(b) Instant Blue-stained SDS PAGE gel of co-purified Sei1-3xFLAG and Ldb16-SBP. Input pertains to the material injected onto the size exclusion column. Each lane is taken from a consecutive 1ml fraction following the void fraction. Red arrows denote samples taken for cryo-EM structure determination. Two repeats of the purification were carried out with similar results.

(c) Sei1 sequence of the central helices region and the segment replaced by GGSGGS linker (residues 161-187)

(d) Western blot of Sei1 and Ldb16 in *sei1Δ* cells endogenously expressing Sei1 WT and Sei1GGSGGS from a plasmid. This was repeated three times with similar results.

(e) Immuno blots following size exclusion chromatography of 1% DDM 0.01% CHS solubilized *sei1Δ* cells, expressing either WT Sei1 or Sei1<sup>GGSGGS</sup> from a plasmid under an *ADH1* promoter. A sample of fractions 9-23 (1ml each) from a superose6 column were run on an SDS PAGE gel and immunoblotted for Sei1 and Ldb16. This was repeated twice with similar results.

(f) WT Sei1, WT Sei1 FLAG and Sei<sup>GGSGGS</sup>-FLAG were immunoprecipitated with FLAG beads from a crude membrane fraction solubilized with 1% DMNG. Eluted proteins were analyzed by SDS-PAGE and immunoblotting. \*=Non specific bands. This was repeated twice with similar results.

(g) Analysis of LDs in cells with the indicated genotype after staining with the neutral lipid dye BODIPY 493/503. Lipid droplet biogenesis was induced by the addition of 2% galactose to cells with indicated genotype expressing DGA1 from the *GAL1* promoter. Time is in hours. Scale bar corresponds to 5  $\mu$ m.

(h) Quantification of LD/cell upon induction of LD formation as in (g). Number of LDs per cell was quantified for a minimum of 50 cells per timepoint.

(i) Western blot of Sei1 and Ldb16 in cells with the indicated genotype. Proteins were expressed at endogenous levels.

(j) Ldb16-FLAG and FLAG tagged Ldb16 mutants were immunoprecipitated with FLAG beads from a crude membrane fraction solubilized with 1% DMNG. Eluted proteins were analyzed by SDS-PAGE and immunoblotting. \*=Nonspecific bands.

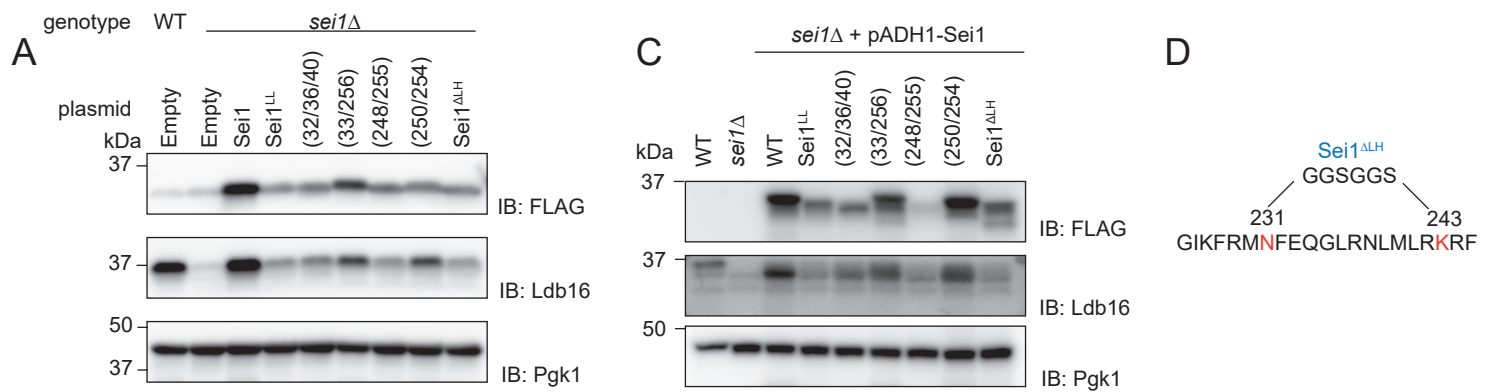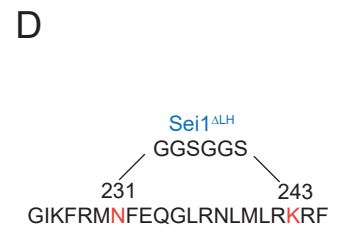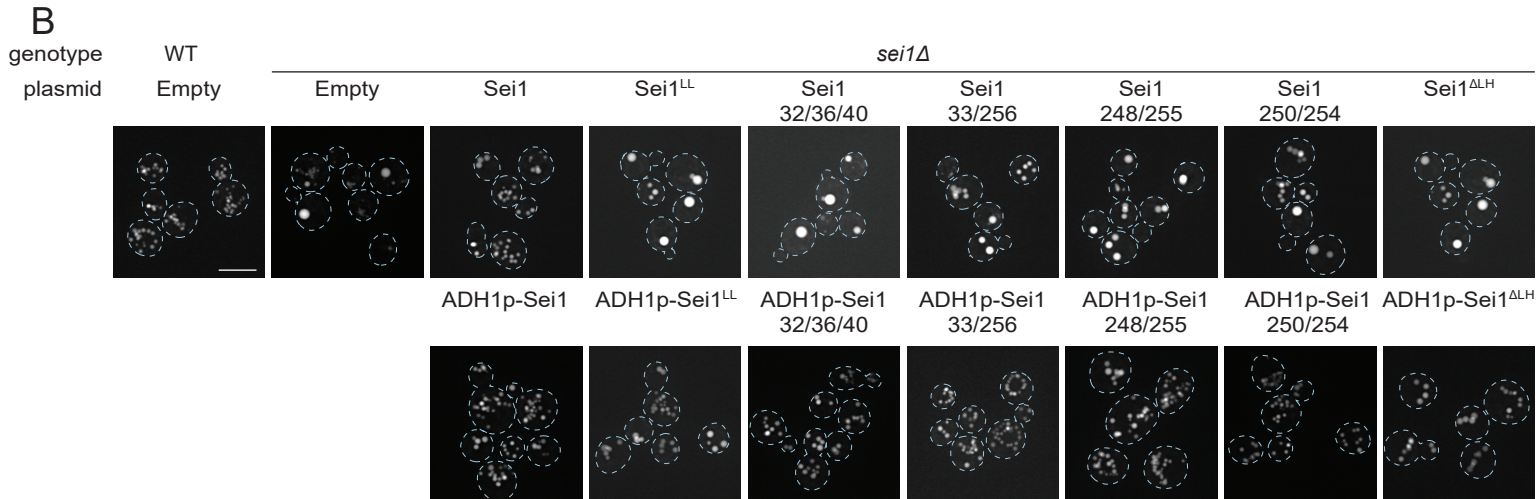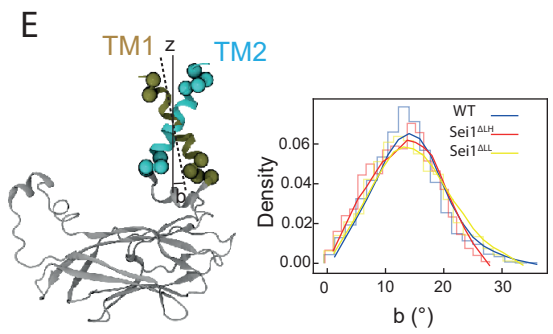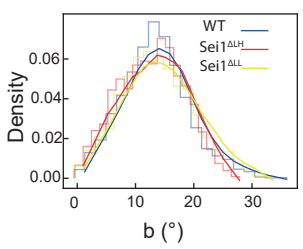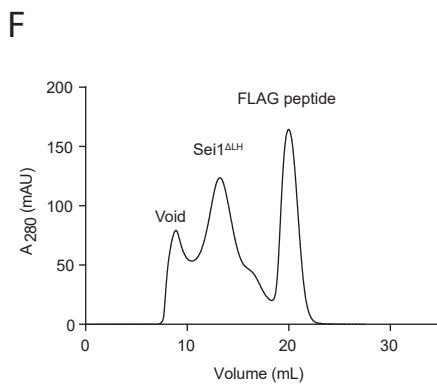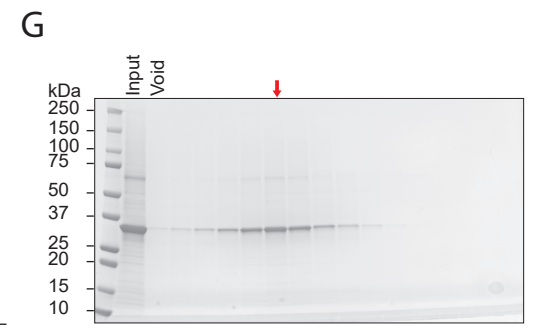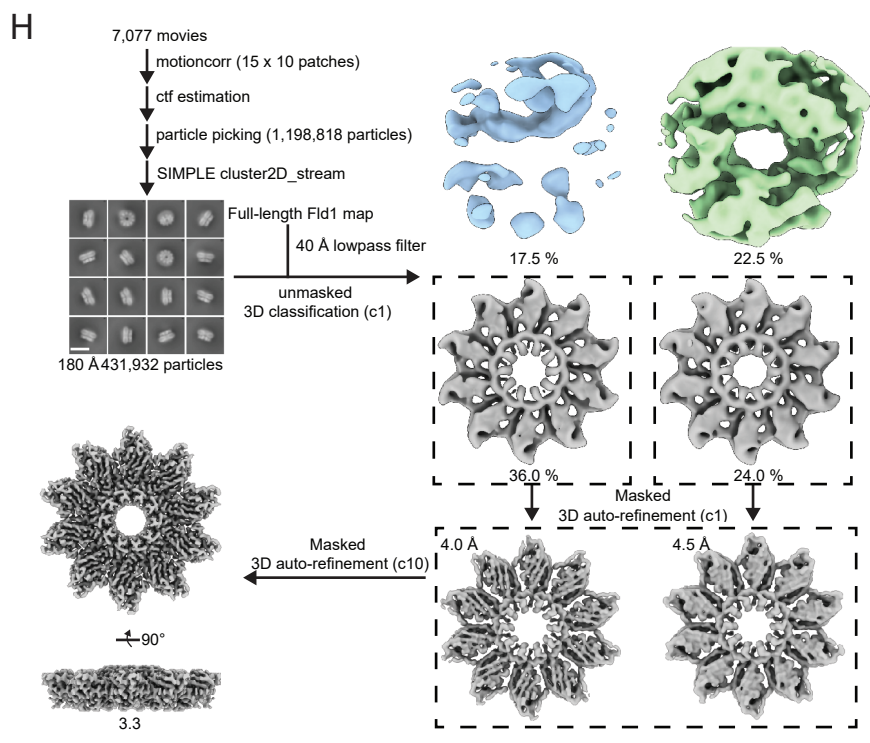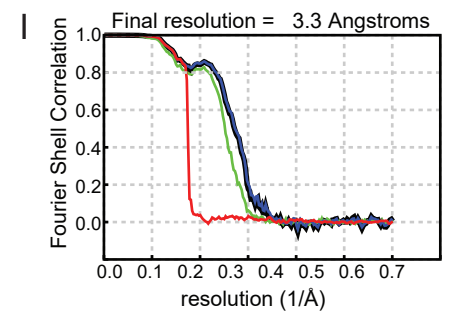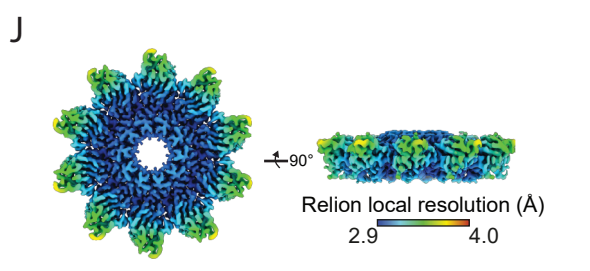

**Figure S4 – Sei1 Locking Helix positions transmembrane segments and facilitates Ldb16 binding**

(a) Western blot of Sei1 and Ldb16 in cells with the indicated genotype. Proteins were expressed at endogenous levels. Indicated residues were replaced with alanine unless stated otherwise. This was repeated twice with similar results.

(b) Analysis of LDs in cells with the indicated genotype after staining with the neutral lipid dye Bodipy493/503. Scale bar corresponds to 5  $\mu\text{m}$ . Indicated residues were replaced with alanine unless stated otherwise. A minimum of 3 biological repeats were analyzed with similar results.

(c) Western blot of Sei1 and Ldb16 in cells with the indicated genotype. Proteins were expressed under the *ADH1* promoter. Indicated residues were replaced with alanine unless stated otherwise. This was repeated twice with similar results.

(d) Sei1 sequence of the LH and the segment replaced by GGSGGS linker (residues 231-243)

(e) schematic representation of the angle ( $\alpha$ ) between Sei1 TM1 and TM2 analyzed by atomistic molecular dynamic simulations. Data are plotted as per Fig 4E and F.

(f) Size exclusion chromatogram of the Sei1<sup>ΔLH</sup> purification run used for cryo-EM structure determination.  $A_{280}$  is the absorption at 280 nm in arbitrary units.

(g) Instant Blue-stained SDS PAGE gel of purified Sei1<sup>ΔLH</sup>. Input pertains to the material injected onto the size exclusion column. Each lane is taken from a consecutive 1ml fraction following the void fraction. Red arrow denotes sample taken for cryo-EM structure determination.

(h) Cryo-EM data processing workflow for Sei1<sup>ΔLH</sup>.

(i) Gold-standard FSC curves used for global-resolution estimates of Sei1<sup>ΔLH</sup> map, as determined within RELION-3.1. Red, phase-randomized; green, unmasked; blue, masked; black, corrected.

(j) Local-resolution estimation of reconstructed Sei1<sup>ΔLH</sup> map as determined within RELION-3.1. Volume contoured at threshold level of 0.04, with detergent density omitted for clarity.



**A**

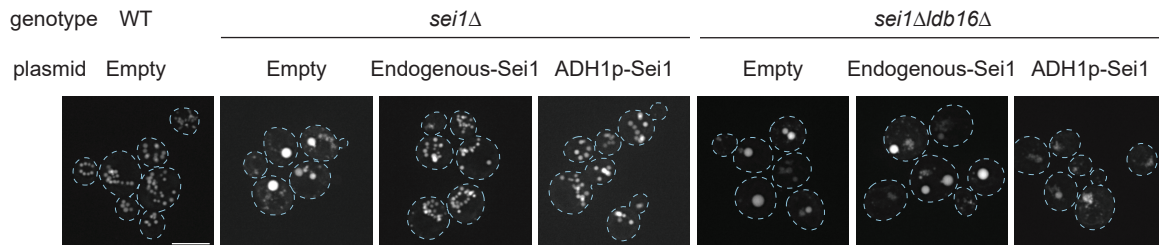

**B**

TM1 WT 18 IVVAFLIQLLLIILPLSILYHDFYLR 44  
 Sei1<sup>SecTM</sup> LIWTGVSLLIFLILGQIPLYGIV

TM2 WT 245 FLSYIIGISIFHCICVLF 265  
 Sei1<sup>WALP</sup> GWWLALALALALALALW

**C**

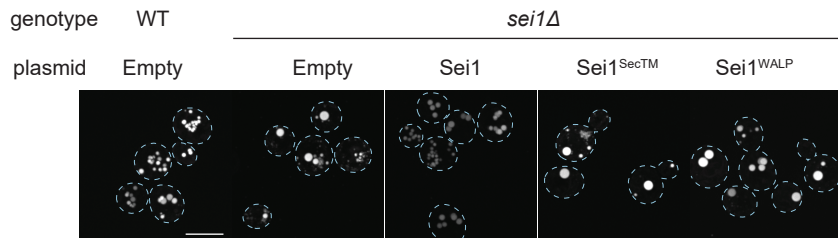

**D**

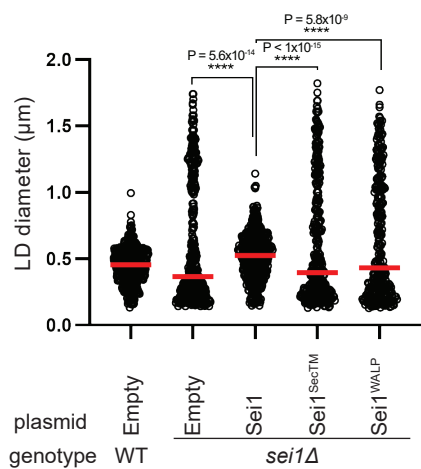

**E**

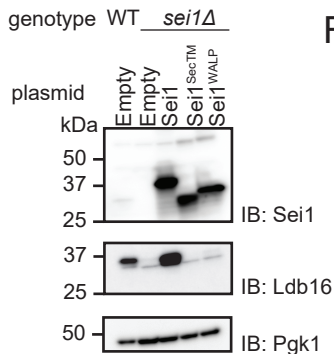

**F**

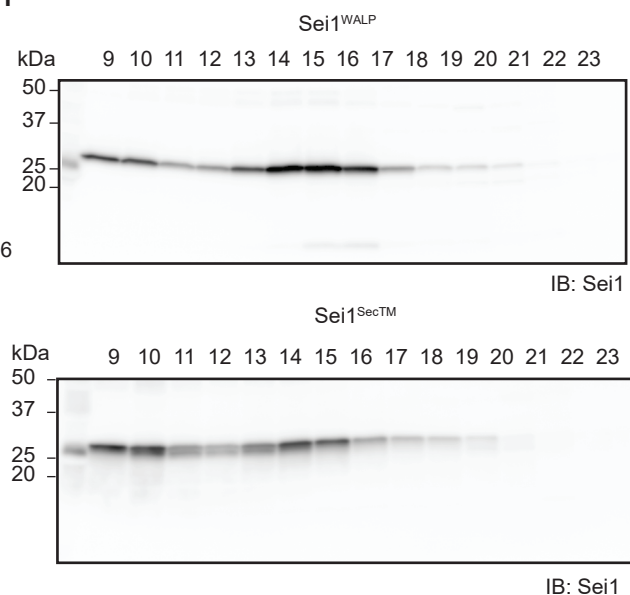

**G**

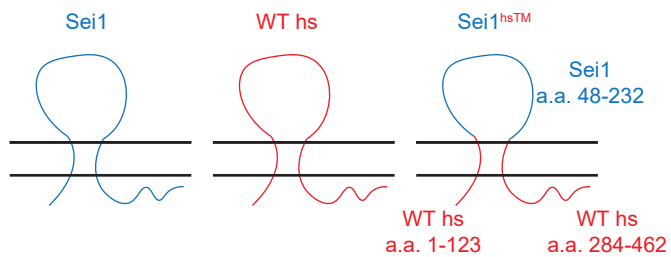

## Figure S5 – Sei1 transmembrane segments contribute to LD formation

(a) Analysis of LDs in cells with the indicated genotype after staining with the neutral lipid dye Bodipy493/503. Scale bar corresponds to 5  $\mu\text{m}$ . A minimum of 3 biological repeats were analyzed with similar results.

(b) Amino acid sequence of Sec61 TM1 and WALPs used to replace TM1 (Sei1<sup>SecTM</sup>) and TM2 (Sei1<sup>WALP</sup>), respectively.

(c) Analysis of LDs in cells with the indicated genotype after staining with the neutral lipid dye Bodipy493/503. Scale bar corresponds to 5  $\mu\text{m}$ .

(d) Quantification of LD diameter of cells shown in (b). At least 100 LDs were analysed for a minimum of 3 biological repeats. Red bars represent median diameter.  $n=3$ . Difference in distribution of LD size was tested using a two sided Kolmogorov-Smirnov test (\*\*\*\*  $p < 0.0001$ , *n.s.* non-significant).

(e) Western blot of Sei1 and Ldb16 in cells with the indicated genotype. Proteins were expressed under the *ADH1* promoter. This was repeated three times with similar results.

(f) Immuno blots following size exclusion chromatography of 1% DDM 0.01% CHS solubilized *sei1 $\Delta$*  cells, expressing either Sei1<sup>WALP</sup> or Sei1<sup>SecTM</sup> from a plasmid under an *ADH1* promoter. A sample of fractions 9-23 (1ml each) from a superose6 column were run on an SDS PAGE gel and immunoblotted for Sei1. This was repeated twice with similar results.

(h) Scheme of Sei1<sup>hsTM</sup>. Sei1 -blue, WT hs -red.

**Table S1 - List of strains used in this study**

| <b>Strain</b>                           | <b>Identifier</b> | <b>Genotype</b>                                                    | <b>Origin</b>            |
|-----------------------------------------|-------------------|--------------------------------------------------------------------|--------------------------|
| <b>BY4741</b>                           | yPC1505           | MATa <i>his3Δ1 leu2Δ0 met15Δ0 ura3Δ0</i>                           | (Brachmann et al., 1998) |
| <b>FY251</b>                            | yPC1507           | MATa <i>his3Δ1 leu2Δ0 trp1Δ63 ura3-52</i>                          | Fred Winston             |
| <b><i>sei1Δ</i></b>                     | yPC3975           | MATa <i>his3Δ1 leu2Δ0 met15Δ0 ura3Δ0 sei1::KanR</i>                | (Grippa et al., 2015)    |
| <b><i>ldb16Δ</i></b>                    | yPC4281           | MATa <i>his3Δ1 leu2Δ0 met15Δ0 ura3Δ0 ldb16::NAT</i>                | This study               |
| <b><i>sei1Δ</i><br/><i>ldb16Δ</i></b>   | yPC4299           | MATa <i>his3Δ1 leu2Δ0 met15Δ0 ura3Δ0 sei1::NAT ldb16::hygB</i>     | This study               |
| <b><i>sei1Δ</i><br/><i>Ldb16-HA</i></b> | yPC12392          | MATa <i>his3Δ1 leu2Δ0 trp1Δ63 ura3-52 sei1::NAT LDB16-3xHA-HIS</i> | This study               |

**Table S2 - List of plasmids used in this study**

| <b>Identifier</b> | <b>Plasmid</b>                                                                  | <b>Origin</b>       |
|-------------------|---------------------------------------------------------------------------------|---------------------|
| <b>bPC557</b>     | pESC-TRP <i>TyrRS-tRNA CUA</i> for pBpa incorporation                           | (Chin et al., 2003) |
| <b>bPC1940</b>    | pRS416 <i>P<sub>ADH1</sub> Sei1-3xFLAG T<sub>ADH1</sub></i>                     | This study          |
| <b>bPC1887</b>    | pRS423 <i>P<sub>GAL1</sub> Sei1-3xFLAG T<sub>CYC1</sub></i>                     | This study          |
| <b>bPC1888</b>    | pRS426 <i>P<sub>GAL1</sub> LDB16-SBP T<sub>CYC1</sub></i>                       | This study          |
| <b>bPC1978</b>    | pRS423 <i>P<sub>GAL1</sub> Sei1(231-243 to GGSGGS)-3xFLAG T<sub>CYC1</sub></i>  | This study          |
| <b>bPC2042</b>    | pRS416 <i>P<sub>SEI1</sub> Sei1-3xFLAG T<sub>ADH1</sub></i>                     | This study          |
| <b>bPC2043</b>    | pRS416 <i>P<sub>SEI1</sub> Sei1(231-243 to GGSGGS)-3xFLAG T<sub>ADH1</sub></i>  | This study          |
| <b>bPC2045</b>    | pRS416 <i>P<sub>SEI1</sub> Sei1 (161-187 to GGSGGS)-3xFLAG T<sub>ADH1</sub></i> | This study          |
| <b>bPC2046</b>    | pRS416 <i>P<sub>SEI1</sub> Sei1 (Y37L Y41L)-3xFLAG T<sub>ADH1</sub></i>         | This study          |
| <b>bPC2047</b>    | pRS416 <i>P<sub>SEI1</sub> Sei1 (Y248L F255L)-3xFLAG T<sub>ADH1</sub></i>       | This study          |
| <b>bPC2048</b>    | pRS416 <i>P<sub>SEI1</sub> Sei1 (S33A H256A)-3xFLAG T<sub>ADH1</sub></i>        | This study          |
| <b>bPC2053</b>    | pRS416 <i>P<sub>SEI1</sub> Sei1 (I250A I254A)-3xFLAG T<sub>ADH1</sub></i>       | This study          |
| <b>bPC2113</b>    | pRS416 <i>P<sub>SEI1</sub> Sei1 (L32A I36A F40A)-3xFLAG T<sub>ADH1</sub></i>    | This study          |
| <b>bPC2040</b>    | pRS416 <i>P<sub>ADH1</sub> Sei1(231-243 to GGSGGS)-3xFLAG T<sub>ADH1</sub></i>  | This study          |
| <b>bPC2041</b>    | pRS416 <i>P<sub>ADH1</sub> Sei1 (Y37L Y41L)-3xFLAG T<sub>ADH1</sub></i>         | This study          |
| <b>bPC2105</b>    | pRS416 <i>P<sub>ADH1</sub> Sei1 (Y248L F255L)-3xFLAG T<sub>ADH1</sub></i>       | This study          |
| <b>bPC2106</b>    | pRS416 <i>P<sub>ADH1</sub> Sei1 (S33A H256A)-3xFLAG T<sub>ADH1</sub></i>        | This study          |
| <b>bPC2109</b>    | pRS416 <i>P<sub>ADH1</sub> Sei1 (I250A I254A)-3xFLAG T<sub>ADH1</sub></i>       | This study          |
| <b>bPC2119</b>    | pRS416 <i>P<sub>ADH1</sub> Sei1 (L32A I36A F40A)-3xFLAG T<sub>ADH1</sub></i>    | This study          |
| <b>bPC2124</b>    | pRS316 <i>P<sub>LDB16</sub> LDB16-3xFLAG T<sub>ADH1</sub></i>                   | This study          |
| <b>bPC2127</b>    | pRS316 <i>P<sub>LDB16</sub> LDB16 (S53A/T54A/S55A)-3xFLAG T<sub>ADH1</sub></i>  | This study          |

|                |                                                                                                         |            |
|----------------|---------------------------------------------------------------------------------------------------------|------------|
| <b>bPC2130</b> | pRS316 <i>P<sub>LDB16</sub> LDB16 (S53/55/62A T52/61/63A)-3xFLAG T<sub>ADH1</sub></i>                   | This study |
| <b>bPC2131</b> | pRS316 <i>P<sub>LDB16</sub> LDB16 (44-59 to AASAAS)-3xFLAG T<sub>ADH1</sub></i>                         | This study |
| <b>bPC2132</b> | pRS416 <i>P<sub>ADH1</sub> hs_BSCL2_isoform3-3xFLAG T<sub>ADH1</sub></i>                                | This study |
| <b>bPC2132</b> | pRS416 <i>P<sub>ADH1</sub> BSCL2iso3(1-123)-Sei1(48-232)-BSCL2iso3(284-462)-3xFLAG T<sub>ADH1</sub></i> | This study |
| <b>bPC2083</b> | pRS416 <i>P<sub>ADH1</sub> Sei1-L26 amber (TAG)-3xFLAG T<sub>ADH1</sub></i>                             | This study |
| <b>bPC2084</b> | pRS416 <i>P<sub>ADH1</sub> Sei1-I29 amber (TAG)-3xFLAG T<sub>ADH1</sub></i>                             | This study |
| <b>bPC2085</b> | pRS416 <i>P<sub>ADH1</sub> Sei1-L30 amber (TAG)-3xFLAG T<sub>ADH1</sub></i>                             | This study |
| <b>bPC2086</b> | pRS416 <i>P<sub>ADH1</sub> Sei1-H38 amber (TAG)-3xFLAG T<sub>ADH1</sub></i>                             | This study |
| <b>bPC2087</b> | pRS416 <i>P<sub>ADH1</sub> Sei1-F40 amber (TAG)-3xFLAG T<sub>ADH1</sub></i>                             | This study |
| <b>bPC2088</b> | pRS416 <i>P<sub>ADH1</sub> Sei1-L162 amber (TAG)-3xFLAG T<sub>ADH1</sub></i>                            | This study |
| <b>bPC2089</b> | pRS416 <i>P<sub>ADH1</sub> Sei1-T163 amber (TAG)-3xFLAG T<sub>ADH1</sub></i>                            | This study |
| <b>bPC2090</b> | pRS416 <i>P<sub>ADH1</sub> Sei1-S165 amber (TAG)-3xFLAG T<sub>ADH1</sub></i>                            | This study |
| <b>bPC2091</b> | pRS416 <i>P<sub>ADH1</sub> Sei1-P168 amber (TAG)-3xFLAG T<sub>ADH1</sub></i>                            | This study |
| <b>bPC2092</b> | pRS416 <i>P<sub>ADH1</sub> Sei1-Q169 amber (TAG)-3xFLAG T<sub>ADH1</sub></i>                            | This study |
| <b>bPC2093</b> | pRS416 <i>P<sub>ADH1</sub> Sei1-E170 amber (TAG)-3xFLAG T<sub>ADH1</sub></i>                            | This study |
| <b>bPC2094</b> | pRS416 <i>P<sub>ADH1</sub> Sei1-E172 amber (TAG)-3xFLAG T<sub>ADH1</sub></i>                            | This study |
| <b>bPC2095</b> | pRS416 <i>P<sub>ADH1</sub> Sei1-P176 amber (TAG)-3xFLAG T<sub>ADH1</sub></i>                            | This study |
| <b>bPC2096</b> | pRS416 <i>P<sub>ADH1</sub> Sei1-W186 amber (TAG)-3xFLAG T<sub>ADH1</sub></i>                            | This study |
| <b>bPC2097</b> | pRS416 <i>P<sub>ADH1</sub> Sei1-L187 amber (TAG)-3xFLAG T<sub>ADH1</sub></i>                            | This study |
| <b>bPC2098</b> | pRS416 <i>P<sub>ADH1</sub> Sei1-F245 amber (TAG)-3xFLAG T<sub>ADH1</sub></i>                            | This study |

|                |                                                                              |            |
|----------------|------------------------------------------------------------------------------|------------|
| <b>bPC2099</b> | pRS416 <i>P<sub>ADH1</sub> Sei1-L246 amber (TAG)-3xFLAG T<sub>ADH1</sub></i> | This study |
| <b>bPC2100</b> | pRS416 <i>P<sub>ADH1</sub> Sei1-I252 amber (TAG)-3xFLAG T<sub>ADH1</sub></i> | This study |
| <b>bPC2101</b> | pRS416 <i>P<sub>ADH1</sub> Sei1-I254 amber (TAG)-3xFLAG T<sub>ADH1</sub></i> | This study |
| <b>bPC2102</b> | pRS416 <i>P<sub>ADH1</sub> Sei1-I259 amber (TAG)-3xFLAG T<sub>ADH1</sub></i> | This study |
| <b>bPC2103</b> | pRS416 <i>P<sub>ADH1</sub> Sei1-F263 amber (TAG)-3xFLAG T<sub>ADH1</sub></i> | This study |

**Table S3. Oligonucleotides used in this study.**

| Primer | Nucleotide sequence (5'-3')                                            | Purpose                                                                                    |
|--------|------------------------------------------------------------------------|--------------------------------------------------------------------------------------------|
| 185    | CTATTGTA CTGAGCGAGGCAAGCTAAACAGATC                                     | Reverse Primer 50 bp downstream ADH1 terminator                                            |
| 491    | CGGACATCGTTAATATAAAGATTTTACGAAGGAAT<br>TCTAGGGGTCGACGGATCCCCGGGTT      | Forward primer for tagging of LDB16 ORF                                                    |
| 492    | TCTATCATTCACTTGTTAGTGCATGAGAAGAAGTA<br>ATTGCTCGATGAATTCCGAGCTCGTT      | Reverse primer for tagging/deletion of LDB16 ORF                                           |
| 570    | GCAACTGTAGGAGGAGAAAGCAGGTATATAACTAG<br>CCGCAATCGGATCCCCGGGTTAATTAA     | Forward primer for deletion of LDB16 ORF                                                   |
| 763    | CTTAATGATTGCGGCCGCTGATAGACAACCACACG<br>GTC                             | Forward Primer 450 bp upstream of LDB16 ORF                                                |
| 4037   | CAATCAACTTCCGGAGTGTA AAAACTGATTTTCAA<br>TGTCTACAGAAAAGGTAGACC          | Forward primer for insertion of BSCL2 into pRS416-ADH1P                                    |
| 4038   | TTATTTAGAAGTGGCGGCCTCAGGAACTAAAGCA<br>GGGGG                            | Reverse primer for insertion of BSCL2 into pRS416-ADH1P                                    |
| 4043   | ACTATTCCTATATGCCGACAGATTCCTCTAACGTAG<br>TCCC                           | Forward Primer amplifying centre of Sei1 for construction of BSCL2-Sei1 chimeras           |
| 4044   | AGGTATCTGAGCCCAGTGAAAAAATTCATCCTAAA<br>CTTAATCCCCT                     | Reverse Primer amplifying centre of Sei1 for construction of BSCL2-Sei1 chimeras           |
| 4041   | GCTGAGGTGGCTGACGGCAGGTAATAGTCTTAGGT<br>AA                              | Reverse Primer amplifying C-terminal part of BSCL2 for construction of BSCL2-Sei1 chimeras |
| 4042   | CGCATCCACGCGCACGAGCAGGGATTAAGAACTT                                     | Forward Primer amplifying N-terminal part of BSCL2 for construction of BSCL2-Sei1 chimeras |
| 4093   | GATTCTAGAACTAGTATGAAAATCAATGTATCCCG<br>TCCATT                          | Amplifying Sei1 3xFlag from pRS423 PGAL1 Forward                                           |
| 4094   | TACATGACTCGAGCTACTTGTTCATCGTCATCCTTGT<br>AGTCG                         | Amplifying Sei1 3xFlag from pRS423 PGAL1 Reverse                                           |
| 4095   | GAAGTAGTGGATCCATGTTTGTGGTGGATTGGAGC                                    | Amplifying ldb16-SBP from pRS426 PGAL1 Forward                                             |
| 4096   | CATGACTCGAGGTCGACTCATGGTTCACGTTGACC                                    | Amplifying ldb16-SBP from pRS426 PGAL1 Reverse                                             |
| 4107   | GAAAGTGGGATTAAGTTTAGGATGGGTGGCAGTGG<br>TGCCAGTAGATTTTTATCTTATATTATTGGC | Generating Sei1 N231-K243 replaced with GSGGS linker Forward                               |

|      |                                                                       |                                                                                 |
|------|-----------------------------------------------------------------------|---------------------------------------------------------------------------------|
| 4108 | GCCAATAATATAAGATAAAAATCTACTGCCACCAC<br>TGCCACCCATCCTAAACTTAATCCCCTTTC | Generating Sei1 N231-K243<br>replaced with GSGGS linker<br>Reverse              |
| 4109 | ACTGCCACCACTGCCACCGAGGCAGACAATAGGTCT<br>AGAAG                         | Generating Sei1 A161-<br>G175/L187 replaced with<br>GSGGS linker Reverse        |
| 4110 | GGTGGCAGTGGTGGCAGTCCATCACGTCTAGACGT<br>TTAC                           | Generating Sei1 A161-G175<br>replaced with GSGGS linker<br>Forward              |
| 4111 | GGTGGCAGTGGTGGCAGTAATACAATAAGAATAGA<br>GGACAAAATATC                   | Generating Sei1 A161-L187<br>replaced with GSGGS linker<br>Forward              |
| 4118 | CAATCAACTCCGGAGTGTA AAAACTGATTTTCAA<br>TGAAAATCAATGTATCCCG            | Forward primer for<br>amplifying Sei1 from pRS416<br>plasmid                    |
| 4120 | CAGGAAAAATCCAAGAAACATAGCTGAGGCGGCC<br>ACTTCTAAATAA                    | Reverse primer for<br>amplifying Sei1 from pRS416<br>plasmid                    |
| 4159 | CATTCTTCCTTTATCGATCTTAATATTACACGATTT<br>TTTACTAAGACTATTACCTGCC        | Generating Y37L Y41L<br>(Sei1 $\Delta$ LL) point mutations<br>into Sei1 Forward |
| 4160 | GGCAGGTAATAGTCTTAGTAAAAAATCGTGTAATA<br>TTAAGATCGATAAAGGAAGAATG        | Generating Y37L Y41L<br>(Sei1 $\Delta$ LL) point mutations<br>into Sei1 Reverse |
| 4161 | GCTTCGAAAAAGATTTTTATCTTTAATTATTGGCA<br>TTTCAATTTTACATTGCATAATATGTGTAC | Generating Y248L F255L<br>point mutations into Sei1<br>Forward                  |
| 4162 | GTACACATATTATGCAATGTAAAATTGAAATGCCA<br>ATAATTAAGATAAAAATCTTTTTCGAAGC  | Generating Y248L F255L<br>point mutations into Sei1<br>Reverse                  |
| 4171 | GCTAATCATTCTTCCTTTAGCGATCTTAATATATC<br>ACGATTTTACC                    | Generating S33A point<br>mutations into Sei1 Forward                            |
| 4172 | GGTAAAAATCGTGATATATTAAGATCGCTAAAGGA<br>AGAATGATTAGC                   | Generating S33A point<br>mutations into Sei1 Reverse                            |
| 4173 | CTTATATTATTGGCATTTC AATTTTCGCTTGCATA<br>ATATGTGTACTTTTTTTTATC         | Generating H256A point<br>mutations into Sei1 Forward                           |
| 4174 | GATAAAAAAAGTACACATATTATGCAAGCGAAAA<br>TTGAAATGCCAATAATATAAG           | Generating H256A point<br>mutations into Sei1 Reverse                           |
| 4185 | GAAAAAGATTTTTATCTTATATTGCTGGCATTTC A<br>GCTTTCCATTGCATAATATGTGTAC     | Generating I250A I254A<br>point mutations into Sei1<br>Forward                  |



|      |                                                                        |                                                                |
|------|------------------------------------------------------------------------|----------------------------------------------------------------|
| 4186 | GTACACATATTATGCAATGGAAAGCTGAAATGCCA<br>GCAATATAAGATAAAAAATCTTTTTTC     | Generating I250A I254A<br>point mutations into Sei1<br>Reverse |
| 4195 | CAATTTTCCATTGCATAAATATGTGTACTTTAGTTT<br>ATCACAGGTTGCACTGCATTC          | Generating amber codon site<br>in Sei1 F263 Forward            |
| 4196 | GAATGCAGTGCAACCTGTGATAAACTAAAGTACAC<br>ATATTATGCAATGGAAAATTG           | Generating amber codon site<br>in Sei1 F263 Reverse            |
| 4197 | ACGATTCCATGTGCGCTCAGTAGATCGAACAACT<br>AGGCCCATCACGTCTAG                | Generating amber codon site<br>in Sei1 E170 Forward            |
| 4198 | TGATGGGCCTAGTTGTTGATCTACTGAGGCGACA<br>TGGAATCCGTCAGTGCG                | Generating amber codon site<br>in Sei1 E170 Reverse            |
| 4199 | GATTCCATGTGCGCTCAGGAGATCTAGCAACTAGG<br>CCCATCACGTCTAGAC                | Generating amber codon site<br>in Sei1 E172 Forward            |
| 4200 | GTCTAGACGTGATGGGCCTAGTTGCTAGATCTCCT<br>GAGGCGACATGGAATC                | Generating amber codon site<br>in Sei1 E172 Reverse            |
| 4201 | ATCTTAATATATCACGATTAGTACCTAAGACTATT<br>ACCTGCCGATTC                    | Generating amber codon site<br>in Sei1 F40 Forward             |
| 4202 | GAATCGGCAGGTAATAGTCTTAGGACTAATCGTG<br>ATATATTAAGATCGATAAAG             | Generating amber codon site<br>in Sei1 F40 Reverse             |
| 4203 | GAAACTTGATGCTTCGAAAAAGATAGTTATCTTAT<br>ATTATTGGCATTTC                  | Generating amber codon site<br>in Sei1 F245 Forward            |
| 4204 | GAAATGCCAATAATATAAGATAACTATCTTTTTTCG<br>AAGCATCAAGTTTC                 | Generating amber codon site<br>in Sei1 F245 Reverse            |
| 4205 | CTTCCTTTATCGATCTTAATATATTAGGATTTTTA<br>CCTAAGACTATTAC                  | Generating amber codon site<br>in Sei1 H38 Forward             |
| 4206 | CTTCCTTTATCGATCTTAATATATTAGGATTTTTA<br>CCTAAGACTATTAC                  | Generating amber codon site<br>in Sei1 H38 Reverse             |
| 4207 | GCATTTCTGATACAATTGCTAATCTAGCTTCCTTTA<br>TCGATCTTAATATATC               | Generating amber codon site<br>in Sei1 I29 Forward             |
| 4208 | GATATATTAAGATCGATAAAGGAAGCTAGATTAGC<br>AATTGTATCAGAAATGC               | Generating amber codon site<br>in Sei1 I29 Reverse             |
| 4209 | GATTTTTATCTTATATTATTGGCTAGTCAATTTTC<br>CATTGCATAAATATGTGTAC            | Generating amber codon site<br>in Sei1 I252 Forward            |
| 4210 | ACATATTATGCAATGGAAAATTGACTAGCCAATAA<br>TATAAGATAAAAAATCTTTTTTC         | Generating amber codon site<br>in Sei1 I252 Reverse            |
| 4211 | GATTTTTATCTTATATTATTGGCATTTCATAGTTC<br>CATTGCATAAATATGTGTACTTTTTTTTATC | Generating amber codon site<br>in Sei1 I254 Forward            |
| 4212 | GTACACATATTATGCAATGGAAGTATGAAATGCCA<br>ATAATATAAGATAAAAAATCTTTTTTC     | Generating amber codon site<br>in Sei1 I254 Reverse            |

|      |                                                                |                                                     |
|------|----------------------------------------------------------------|-----------------------------------------------------|
| 4213 | GGCATTTC AATTTTCCATTGCATATAGTGTG TACT<br>TTTTTTTATCACAGGTTGCAC | Generating amber codon site<br>in Sei1 I259 Forward |
| 4214 | GTGCAACCTGTGATAAAAAAAGTACACACTATAT<br>GCAATGGAAAATTGAAATGCC    | Generating amber codon site<br>in Sei1 I259 Reverse |
| 4215 | GTTGCATTCTGATACAATAGCTAATCATTCTTCCT<br>TTATC                   | Generating amber codon site<br>in Sei1 L26 Forward  |
| 4216 | GATAAAGGAAGAATGATTAGCTATTGTATCAGAAA<br>TGCAACAACAATATATG       | Generating amber codon site<br>in Sei1 L26 Reverse  |
| 4217 | GCATTTCTGATACAATTGCTAATCATTTAGCCTTT<br>ATCGATCTTAATATATC       | Generating amber codon site<br>in Sei1 L30 Forward  |
| 4218 | GATATATTAAGATCGATAAAGGCTAAATGATTAGC<br>AATTGTATCAGAAATGC       | Generating amber codon site<br>in Sei1 L30 Reverse  |
| 4219 | CTATTGTCTGCCTCGCATAGACGGATTCCATGTCCG<br>CTC                    | Generating amber codon site<br>in Sei1 L162 Forward |
| 4220 | GACATGGAATCCGTCTATGCGAGGCAGACAATAGG<br>TCTAG                   | Generating amber codon site<br>in Sei1 L162 Reverse |
| 4221 | GATCGAACAACTAGGCCCATCACGTTAGGACGTTT<br>ACGATGAAGAATGGC         | Generating amber codon site<br>in Sei1 L179 Forward |
| 4222 | GCCATTCTTCATCGTAAACGTCCTAACGTGATGGGC<br>CTAGTTGTTGATC          | Generating amber codon site<br>in Sei1 L179 Reverse |
| 4223 | CTAGACGTTTACGATGAAGAATGGTAGAATACAAT<br>AAGAATAGAGGACAAAATATC   | Generating amber codon site<br>in Sei1 L187 Forward |
| 4224 | GTCCTCTATTCTTATTGTATTCTACCATTCTTCATC<br>GTAAACGTCTAGACGTG      | Generating amber codon site<br>in Sei1 L187 Reverse |
| 4225 | GAAACTTGATGCTTCGAAAAAGATTTTAGTCTTAT<br>ATTATTGGCATTTC AATTTTCC | Generating amber codon site<br>in Sei1 L246 Forward |
| 4226 | GGAAAATTGAAATGCCAATAATATAAGACTAAAAT<br>CTTTTTTCGAAGCATCAAGTTTC | Generating amber codon site<br>in Sei1 L246 Reverse |
| 4227 | CTCGCACTGACGGATTCCATGTGCTAGCAGGAGAT<br>CGAACAACTAGGCCCATCAC    | Generating amber codon site<br>in Sei1 P168 Forward |
| 4228 | GTGATGGGCCTAGTTGTTTCGATCTCCTGCTACGACA<br>TGGAATCCGTCAGTGCGAG   | Generating amber codon site<br>in Sei1 P168 Reverse |
| 4229 | CAGGAGATCGAACAACTAGGCTAGTCACGTCTAGA<br>CGTTTACGATG             | Generating amber codon site<br>in Sei1 P176 Forward |
| 4230 | CATCGTAAACGTCTAGACGTGACTAGCCTAGTTGT<br>TCGATCTCCTG             | Generating amber codon site<br>in Sei1 P176 Reverse |
| 4231 | ACTGACGGATTCCATGTGCGCTTAGGAGATCGAAC<br>AACTAGGCCCATCACGTC      | Generating amber codon site<br>in Sei1 Q169 Forward |

|      |                                                                                                             |                                                                                    |
|------|-------------------------------------------------------------------------------------------------------------|------------------------------------------------------------------------------------|
| 4232 | GACGTGATGGGCCTAGTTGTTTCGATCTCCTAAGGC<br>GACATGGAATCCGTCA                                                    | Generating amber codon site<br>in Sei1 Q169 Reverse                                |
| 4233 | ACTGACGGATTAGATGTCGCCTCAGGAGATCGAAC                                                                         | Generating amber codon site<br>in Sei1 S165 Forward                                |
| 4234 | CTCCTGAGGCGACATCTAATCCGTCAGTGCAGGCA<br>GAC                                                                  | Generating amber codon site<br>in Sei1 S165 Reverse                                |
| 4235 | GTCTGCCTCGCACTGTAGGATTCCATGTCGCCTCAG<br>GAG                                                                 | Generating amber codon site<br>in Sei1 T163 Forward                                |
| 4236 | AGGCGACATGGAATCCTACAGTGCAGGAGCAGACAA<br>TAGGTCTAG                                                           | Generating amber codon site<br>in Sei1 T163 Reverse                                |
| 4237 | CTAGACGTTTACGATGAAGAATAGCTAAATACAAT<br>AAGAATAGAGG                                                          | Generating amber codon site<br>in Sei1 W186 Forward                                |
| 4238 | CCTCTATTCTTATTGTATTTAGCTATTCTTCATCGT<br>AAACGTCTAGACG                                                       | Generating amber codon site<br>in Sei1 W186 Reverse                                |
| 4239 | CTTATTTAGAAGTGGCGCGCCTCACTTGTCATCGTC<br>ATCCTTGTAG                                                          | Generating Sei1 tagging with<br>3xFLAG in pRS416                                   |
| 4240 | TTGATTTGGACTGGTGTTCCTTTGTTGATTTTTTT<br>GATTTTGGGTCAAATTCATTGTATGGTATTGTTT<br>TACCTGCCGATTCCTCTAACG          | Generating sec61 TM1<br>instead of the Sei1 TM1<br>Forward                         |
| 4241 | AACAATACCATACAATGGAATTTGACCCAAAATCA<br>AAAAAATCAACAAAGAAACACCAGTCCAAATCAAA<br>TATGAACTCCATTGTAAAAACTGTAATGG | Generating sec61 TM1<br>instead of the Sei1 TM1<br>Reverse                         |
| 4242 | AGCCCACCACAGTGCTAGGGCGAGAGCAAGCGCCA<br>GTGCTAGGGCGAGAGCAAGCCACCAACCTCTTTTTTC<br>GAAGCATCAAGTTTCTTAATC       | Generating WALP sequence<br>instead of TM2 of Sei1<br>Reverse                      |
| 4244 | GGTTGGTGGCTTGCTCTCGCCCTAGCACTGGCGCTT<br>GCTCTCGCCCTAGCACTGTGGTGGGCTACAGGTTGC<br>ACTGCATTCATTTTTG            | Generating WALP sequence<br>instead of TM2 of Sei1<br>Forward                      |
| 4279 | GCCCCCCTGCTTTAGTTCCGACTACAAAGACCATG<br>ACGGT                                                                | Forward primer for BSCL2<br>tagging with 3xFLAG by<br>Gibson                       |
| 4297 | TGCTGTTTGTGCAACTAAACGTGCCAGTGCCGTCCC<br>CAGGAACAACC                                                         | Forward primer for<br>generating Ldb16 S53A S55A<br>S62A point mutations.          |
| 4298 | GCACTGGCACGTTTAGTTGCACAAACAGCAACATT<br>AGACTTCTATGTGGTTTT                                                   | Reverse primer for<br>generating Ldb16 S53A S55A<br>S62A point mutations.          |
| 4320 | CGCTGCAGCTTGTGCAACTAAACGTGCCAGTGCAGC<br>CCCCAGGAACAACCTCAAT                                                 | Forward primer for Ldb16 to<br>replace TSLS 52-55 by AALA<br>and TST 61-63 by AAA. |

|      |                                                             |                                                                                    |
|------|-------------------------------------------------------------|------------------------------------------------------------------------------------|
| 4321 | CTGGCACGTTTAGTTGCACAAGCTGCAGCGTTAGA<br>CTTCTATGTGGTTTTGACGT | Reverse primer for Ldb16 to<br>replace TSL5 52-55 by AALA<br>and TST 61-63 by AAA. |
| 4300 | TGAGGCCGCAGAAGCCGCACTGGCAGCGTTGATAG<br>GCAATGCCACA          | Forward primer for Ldb16 to<br>replace residues 44-59 by<br>AASAAS                 |
| 4301 | GCTGCCAGTGC GGCTTCTGCGGCCTCACAAACAAGC<br>ACATTAGACTTCTAT    | Reverse primer for Ldb16 to<br>replace residues 44-59 by<br>AASAAS                 |
| 4297 | TGCTGTTTGTGCAACTAAACGTGCCAGTGCCGTCCC<br>CAGGAACAACC         | Forward primer for<br>generating Ldb16 S53A S55A<br>S62A point mutations.          |
| 4306 | CGCATCGTGATACGCTAAGATCGAAGCAGGAAGAA<br>TGATTAGCAATT         | Reverse primer for<br>generating Sei1 32/36/40<br>3xA point mutations              |
| 4307 | GCTTCGATCTTAGCGTATCACGATGCGTACCTAAG<br>ACTATTACCTGC         | Forward primer for<br>generating Sei1 32/36/40<br>3xA point mutations              |

**Table S4:** Cryo-EM data collection, refinement and validation statistics

|                                                     | Sei1<br>(EMDB-13103)<br>(PDB ID 7OXP) | Sei1 <sup>ALH</sup><br>(EMDB-13104)<br>(PDB ID 7OXR) |
|-----------------------------------------------------|---------------------------------------|------------------------------------------------------|
| <b>Data collection and processing</b>               |                                       |                                                      |
| Magnification                                       | 165,000                               | 105,000                                              |
| Voltage (kV)                                        | 300                                   | 300                                                  |
| Electron exposure (e <sup>-</sup> /Å <sup>2</sup> ) | 48                                    | 59.1                                                 |
| Defocus range (μm)                                  | -1.0 to -3.0                          | -1.0 to -3.0                                         |
| Pixel size (Å)                                      | 0.822                                 | 0.832                                                |
| Symmetry imposed                                    | C10                                   | C10                                                  |
| Initial particle images (no.)                       | 1,369,344                             | 1,198,818                                            |
| Final particle images (no.)                         | 234,898                               | 260,532                                              |
| Map resolution (Å)                                  | 2.7                                   | 3.3                                                  |
| FSC threshold                                       | 0.143                                 | 0.143                                                |
| Map resolution range (Å)                            | 2.6-3.6                               | 2.9-4.0                                              |
| <b>Refinement</b>                                   |                                       |                                                      |
| Initial model used (PDB code)                       | none                                  | 7OXP                                                 |
| Model resolution (Å)                                | 2.7                                   | 3.3                                                  |
| FSC threshold                                       | 0.143                                 | 0.143                                                |
| Model resolution range (Å)                          | 2.6-3.6                               | 2.9-4.0                                              |
| Map sharpening <i>B</i> factor (Å <sup>2</sup> )    | -69.6                                 | -151                                                 |
| Model composition                                   |                                       |                                                      |
| Non-hydrogen atoms                                  | 18730                                 | 13670                                                |
| Protein residues                                    | 2300                                  | 1700                                                 |
| Ligands                                             | 0                                     | 0                                                    |
| <i>B</i> factors (Å <sup>2</sup> )                  |                                       |                                                      |
| Protein                                             | 54.7                                  | 33.8                                                 |
| Ligand                                              | 0                                     | 0                                                    |
| R.m.s. deviations                                   |                                       |                                                      |
| Bond lengths (Å)                                    | 0.003                                 | 0.003                                                |
| Bond angles (°)                                     | 0.585                                 | 0.581                                                |
| Validation                                          |                                       |                                                      |
| MolProbity score                                    | 1.49                                  | 1.54                                                 |
| Clashscore                                          | 8.06                                  | 8.45                                                 |
| Poor rotamers (%)                                   | 0.00                                  | 0.00                                                 |
| Ramachandran plot                                   |                                       |                                                      |
| Favored (%)                                         | 97.79                                 | 97.59                                                |
| Allowed (%)                                         | 2.21                                  | 2.41                                                 |
| Disallowed (%)                                      | 0.00                                  | 0.00                                                 |
